# Supplementary material for: Two-way shape memory property and its structural origin of cross-linked poly(ε-caprolactone)
Source: Royal Society of Chemistry journal article supplement (doi:10.1039/c4ra09385b), 2014-10-13
Supplement: c4ra09385b1.pdf [file c4ra09385b1.pdf]

## Supporting Information

### Two-way shape memory property and its structural origin of cross-linked poly( $\epsilon$ -caprolactone)

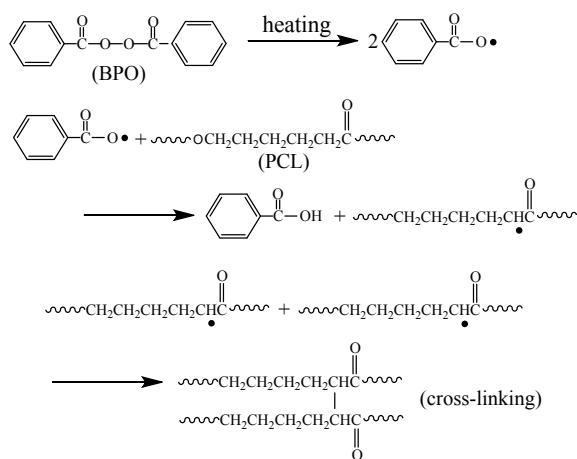

**Fig.S1** The scheme of cross-linking reactions between PCL and BPO.
